# Supplementary material
Source: PubMed Central journal article supplement (PMC5522777)
Supplement: NIHMS853150-supplement-supplement_1.pdf [file NIHMS853150-supplement-supplement_1.pdf]

Supplemental Table A. Weighted estimates of demographic distributions associated with the seven school-related and substance-related risk behaviors

|                                             | Truancy<br>(4-week)<br>% (n) | Grade point<br>average <= C+<br>% (n) | Binge drinking<br>(2-week)<br>% (n) | Alcohol use<br>(30-day)<br>% (n) | Marijuana use<br>(30-day)<br>% (n) | Illicit drug use<br>(30-day)<br>% (n) | Nonmedical Rx<br>drug use (30-day)<br>% (n) |
|---------------------------------------------|------------------------------|---------------------------------------|-------------------------------------|----------------------------------|------------------------------------|---------------------------------------|---------------------------------------------|
| <b>With Risk Behavior</b>                   |                              |                                       |                                     |                                  |                                    |                                       |                                             |
| Sex                                         |                              | ***                                   | ***                                 |                                  | ***                                | ***                                   |                                             |
| Male                                        | 47.5% (1038)                 | 58.9% (688)                           | 55.9% (810)                         | 48.5% (1424)                     | 54.7% (946)                        | 67.2% (112)                           | 51.2% (247)                                 |
| Female                                      | 52.5% (1175)                 | 41.1% (485)                           | 44.1% (644)                         | 51.5% (1522)                     | 45.3% (799)                        | 32.8% (57)                            | 48.8% (239)                                 |
| Race/ethnicity                              | ***                          | ***                                   | ***                                 | ***                              |                                    |                                       |                                             |
| Black                                       | 8.6% (196)                   | 16.8% (196)                           | 7.2% (92)                           | 8.1% (232)                       | 12.1% (211)                        | 13.8% (19)                            | 13.1% (48)                                  |
| White                                       | 55.9% (1247)                 | 44.4% (515)                           | 61.5% (936)                         | 60.2% (1861)                     | 54.7% (1014)                       | 48.3% (95)                            | 53.1% (284)                                 |
| Hispanic                                    | 17.8% (452)                  | 23.1% (327)                           | 15.3% (254)                         | 15.2% (515)                      | 15.1% (294)                        | 17.1% (30)                            | 14.1% (80)                                  |
| Other/missing                               | 17.7% (416)                  | 15.7% (204)                           | 16.0% (259)                         | 16.5% (528)                      | 18.1% (347)                        | 20.8% (47)                            | 19.7% (107)                                 |
| Age                                         | ***                          | ***                                   | **                                  |                                  |                                    |                                       | *                                           |
| Less than 18 years                          | 38.0% (914)                  | 36.5% (472)                           | 38.3% (596)                         | 40.3% (1272)                     | 39.8% (754)                        | 34.9% (66)                            | 35.2% (202)                                 |
| 18 years or older                           | 62.0% (1370)                 | 63.5% (753)                           | 61.7% (901)                         | 59.7% (1773)                     | 60.2% (1047)                       | 65.1% (112)                           | 64.8% (301)                                 |
| Geographical region                         |                              | ***                                   | *                                   | ***                              | ***                                |                                       |                                             |
| Northeast                                   | 19.7% (493)                  | 15.2% (190)                           | 21.9% (369)                         | 20.8% (723)                      | 23.6% (468)                        | 19.3% (41)                            | 14.7% (88)                                  |
| Midwest                                     | 18.4% (510)                  | 23.0% (344)                           | 21.1% (362)                         | 21.6% (748)                      | 20.1% (438)                        | 23.2% (49)                            | 20.4% (125)                                 |
| South                                       | 38.8% (828)                  | 33.8% (371)                           | 34.3% (507)                         | 34.9% (1039)                     | 34.9% (600)                        | 36.8% (65)                            | 43.7% (219)                                 |
| West                                        | 23.1% (480)                  | 28.0% (337)                           | 22.7% (303)                         | 22.7% (626)                      | 21.4% (360)                        | 20.7% (36)                            | 21.2% (87)                                  |
| Metropolitan statistical<br>area/urbanicity | ***                          | **                                    |                                     | **                               | ***                                | **                                    | ***                                         |
| Large MSA                                   | 24.0% (635)                  | 25.6% (350)                           | 27.7% (482)                         | 28.8% (1020)                     | 29.0% (622)                        | 24.3% (57)                            | 22.5% (154)                                 |
| Other MSA                                   | 56.4% (1216)                 | 56.1% (661)                           | 53.3% (748)                         | 52.5% (1516)                     | 54.2% (938)                        | 64.1% (105)                           | 60.8% (274)                                 |
| Non-MSA                                     | 19.6% (460)                  | 18.3% (231)                           | 19.0% (311)                         | 18.7% (600)                      | 16.8% (306)                        | 11.6% (29)                            | 16.7% (91)                                  |
| Parental education                          |                              | ***                                   |                                     | **                               |                                    | **                                    |                                             |
| No college                                  | 27.8% (646)                  | 35.4% (426)                           | 24.6% (375)                         | 23.8% (729)                      | 26.8% (480)                        | 32.9% (57)                            | 29.6% (142)                                 |
| Some college                                | 67.7% (1569)                 | 57.6% (720)                           | 69.7% (1074)                        | 70.1% (2208)                     | 66.1% (1244)                       | 57.1% (110)                           | 64.2% (344)                                 |
| Don't know/missing                          | 4.5% (96)                    | 7.0% (96)                             | 5.7% (92)                           | 6.1% (199)                       | 7.1% (142)                         | 10.0% (24)                            | 6.2% (33)                                   |
| College plans                               | ***                          | ***                                   | ***                                 |                                  | ***                                | ***                                   | **                                          |
| Definitely will attend                      | 54.2% (1299)                 | 29.4% (386)                           | 51.7% (827)                         | 55.5% (2886)                     | 47.5% (925)                        | 41.9% (73)                            | 49.8% (256)                                 |
| Will not attend/other                       | 45.8% (1012)                 | 70.6% (856)                           | 48.3% (714)                         | 44.5% (1351)                     | 52.5% (941)                        | 58.1% (118)                           | 50.2% (263)                                 |
| <b>Without Risk Behavior</b>                |                              |                                       |                                     |                                  |                                    |                                       |                                             |
| Sex                                         |                              |                                       |                                     |                                  |                                    |                                       |                                             |
| Male                                        | 48.3% (2589)                 | 46.0% (3031)                          | 46.4% (2869)                        | 48.2% (2297)                     | 46.4% (2837)                       | 47.5% (3590)                          | 47.8% (3507)                                |
| Female                                      | 51.7% (2760)                 | 54.0% (3561)                          | 53.7% (3319)                        | 51.8% (2474)                     | 53.6% (3272)                       | 52.5% (3973)                          | 52.2% (3813)                                |

|                                          |              |              |              |              |              |              |              |
|------------------------------------------|--------------|--------------|--------------|--------------|--------------|--------------|--------------|
| Race/ethnicity                           |              |              |              |              |              |              |              |
| Black                                    | 13.8% (700)  | 11.4% (732)  | 13.0% (813)  | 14.2% (680)  | 12.3% (736)  | 12.4% (920)  | 12.4% (901)  |
| White                                    | 54.6% (2979) | 56.7% (3820) | 52.6% (3355) | 50.5% (2479) | 53.6% (3370) | 54.7% (4212) | 54.7% (4060) |
| Hispanic                                 | 16.4% (981)  | 15.6% (1143) | 16.3% (1165) | 16.7% (920)  | 16.7% (1186) | 16.8% (1438) | 17.2% (1407) |
| Other/missing                            | 15.3% (876)  | 16.3% (1137) | 18.1% (1208) | 18.6% (964)  | 17.4% (1142) | 16.1% (1294) | 15.7% (1215) |
| Age                                      |              |              |              |              |              |              |              |
| Less than 18 years                       | 43.4% (2449) | 42.6% (2984) | 42.8% (2814) | 42.7% (2166) | 42.3% (2744) | 41.9% (3378) | 42.0% (3262) |
| 18 years or older                        | 56.6% (3049) | 57.4% (3791) | 57.2% (3550) | 57.3% (2738) | 57.7% (3544) | 58.1% (4406) | 58.0% (4278) |
| Geographical region                      |              |              |              |              |              |              |              |
| Northeast                                | 18.1% (1064) | 19.3% (1419) | 18.6% (1305) | 18.1% (961)  | 17.9% (1237) | 19.1% (1606) | 19.4% (1567) |
| Midwest                                  | 21.3% (1412) | 19.8% (1622) | 19.9% (1588) | 19.2% (1229) | 20.1% (1567) | 20.1% (1904) | 20.1% (1839) |
| South                                    | 38.5% (1929) | 39.0% (2458) | 38.9% (2303) | 39.9% (1809) | 39.1% (2303) | 38.0% (2738) | 37.5% (2602) |
| West                                     | 22.2% (1131) | 21.9% (1333) | 22.6% (1345) | 22.8% (1044) | 22.9% (1327) | 22.8% (1616) | 23.0% (1575) |
| Metropolitan statistical area/urbanicity |              |              |              |              |              |              |              |
| Large MSA                                | 29.1% (1715) | 28.2% (2096) | 28.2% (1980) | 27.6% (1466) | 27.8% (1909) | 28.0% (2397) | 28.3% (2306) |
| Other MSA                                | 49.1% (2589) | 50.2% (3235) | 50.6% (3166) | 50.3% (2444) | 50.2% (3064) | 50.9% (3786) | 50.5% (3640) |
| Non-MSA                                  | 21.8% (1232) | 21.6% (1501) | 21.2% (1395) | 22.0% (1133) | 22.0% (1461) | 21.1% (1681) | 21.2% (1637) |
| Parental education                       |              |              |              |              |              |              |              |
| No college                               | 25.0% (1394) | 24.2% (1676) | 25.1% (1645) | 25.8% (1325) | 24.8% (1616) | 25.7% (2024) | 25.5% (1947) |
| Some college                             | 70.3% (3877) | 71.7% (4884) | 67.5% (4410) | 66.3% (3320) | 68.2% (4370) | 69.0% (5411) | 68.9% (5210) |
| Don't know/missing                       | 4.7% (265)   | 4.0% (272)   | 7.4% (486)   | 7.9% (398)   | 7.0% (448)   | 5.3% (429)   | 5.6% (426)   |
| College plans                            |              |              |              |              |              |              |              |
| Definitely will attend                   | 60.5% (3380) | 63.9% (4424) | 57.5% (3812) | 56.4% (2886) | 58.6% (3834) | 57.5% (4614) | 57.6% (4457) |
| Will not attend/other                    | 39.5% (2156) | 36.1% (2408) | 42.5% (2729) | 43.6% (2157) | 41.4% (2600) | 42.5% (3250) | 42.4% (3126) |

Notes: The tests of significance apply to the association between each covariate and engaging in a particular risk behavior. \* p < 0.05, \*\* p < 0.01, \*\*\* p < 0.001.

Data source: 2014 Monitoring the Future Study, Forms 1, 2, 5 and 6.
